# Supplementary material for: Women and Leadership: How Do Women Leaders Contribute to Companies' Sustainable Choices?
Source: Frontiers journal article supplement (doi:10.3389/frsus.2022.930116), 2022-07-05
Supplement: Table_1.docx [file Table_1.docx]

**Table A1.** Survey on female leadership and sustainability. Section 1 – Company profile.

| Company Name:  Location (address):  Contact email:  Respondent Name:  Respondent Role: |  |
| --- | --- |
| Company age: | - 0 to 5 years - 6 to 10 years - 11 to 20 years - More than 21 years |
| Business sector: | - Trade - Industry - Handicraft - Services - Other |
| Company size: | - 1-9 employees - 10-49 employees - 50-249 employees - 250+ employees |
