# Supplementary material for: Women and Leadership: How Do Women Leaders Contribute to Companies' Sustainable Choices?
Source: Frontiers journal article supplement (doi:10.3389/frsus.2022.930116), 2022-07-05
Supplement: Table_3.docx [file Table_3.docx]

**Table A3.** Survey on female leadership and sustainability. Section 3 – Acting as a Female Sustainability Leader.

| Decisions to increase the sustainability of the enterprise you are leading are primarily made in the following way: | - Individually - Majority of votes in the Board of Directors - In collaboration with other members of the company |
| --- | --- |
| What activities or programs have you promoted and implemented as a Sustainability Leader to reduce the environmental impact generated by your business activity? (you can select more than one answer) | - Use of environmental protection brands - Proper waste management (separate waste collection) - Use of low-impact transportation - Selection of suppliers belonging to sustainable chains - Reduction of waste of energy, water and raw materials - Control of atmospheric emissions - Use of renewable energy sources - Presence of an Environmental Manager/Team - Raising employee awareness of environmental policy issues - Other: |
| What activities or programs have you promoted and implemented as a Sustainability Leader to improve the social impact generated by your business? (more than one answer can be selected) | - Promotion of programs or initiatives in areas such as education, culture, health, or the environment - Promotion of local employment - Promotion and selection of local suppliers - Participation in projects in collaboration with schools and/or universities (e.g. school-to-work alternation, curricular/extra-curricular internships, etc.) - Promotion of diversity and gender equality in the workplace - Corporate welfare projects (meal vouchers, fuel vouchers, reimbursement of school/university expenses, etc.). - Ongoing training activities - Employee communication/dialogue activities (company bulletin boards, staff meetings, complaint box, etc.) - Other: |
| As a Sustainability Leader, have you promoted the adoption of certifications? | - Yes - No |
| If the previous answer is yes, what certifications does your company have? (you can select more than one answer) | - ISO 9001 - ISO 14001 - EMAS - SA8000 - ISO 45001 - Other: |
| What activities or programs are planned to increase the company's sustainable development orientation in the future? |  |
