# Supplementary material for: Women and Leadership: How Do Women Leaders Contribute to Companies' Sustainable Choices?
Source: Frontiers journal article supplement (doi:10.3389/frsus.2022.930116), 2022-07-05
Supplement: Table_4.docx [file Table_4.docx]

**Table A4.** Survey on female leadership and sustainability. Section 4 – Contributions and challenges of a Female Sustainability Leader.

| What do you think are the typical traits of a female leader that increase the effectiveness of implementing sustainable development strategies? (you can select more than one answer) | - Ability to empathize and listen - Predisposition to sharing and collaboration - Greater sensitivity to environmental/social issues - Flexibility - Problem-solving - Overall and long-term vision of the surrounding reality - Other: |
| --- | --- |
| What elements do you think most hinder a female leader's efforts to implement sustainable practices? (you can select more than one answer) | - Lack of support from top management due to gender biases - Lack of sharing the same values on sustainability issues - Lack of dialogue and collaboration on sustainable issues - Lack of interest - Lack of funds - Lack of materials/resources/skills - Other: |
| What actions do you think are needed to overcome the challenges and ensure adequate sustainability leadership? |  |
| Any other comments? |  |
